# Supplementary material for: Visible and near-infrared luminescent mesoporous titania microspheres functionalized with lanthanide complexes: microstructure and luminescence with visible excitation
Source: Royal Society of Chemistry journal article supplement (doi:10.1039/c4ra03781b), 2014-01-01
Supplement: c4ra03781b1.pdf [file c4ra03781b1.pdf]

## Supporting information

on

### **Visible and Near-infrared Luminescent Mesoporous Titania Microspheres Functionalized with Lanthanide Complexes: Microstructure and Luminescence with Visible Excitation**

**Lining Sun,\*<sup>a</sup> Zhijuan Wang,<sup>a</sup> Jin Z. Zhang,<sup>c</sup> Jing Feng,<sup>b</sup> Jinliang Liu,<sup>a</sup> Yin  
Zhao,<sup>a</sup> and Liyi Shi\*<sup>a</sup>**

<sup>a</sup> Research Center of Nano Science and Technology, Shanghai University, Shanghai 200444, P. R. China. E-mail: [lnsun@shu.edu.cn](mailto:lnsun@shu.edu.cn) (L. N. Sun); [shiliyi@shu.edu.cn](mailto:shiliyi@shu.edu.cn) (L. Y. Shi)

<sup>b</sup> State Key Laboratory of Rare Earth Resource Utilization, Changchun Institute of Applied Chemistry, Chinese Academy of Sciences, Changchun 130022, P. R. China.

<sup>c</sup> Department of Chemistry and Biochemistry, University of California, Santa Cruz, California 95064, USA

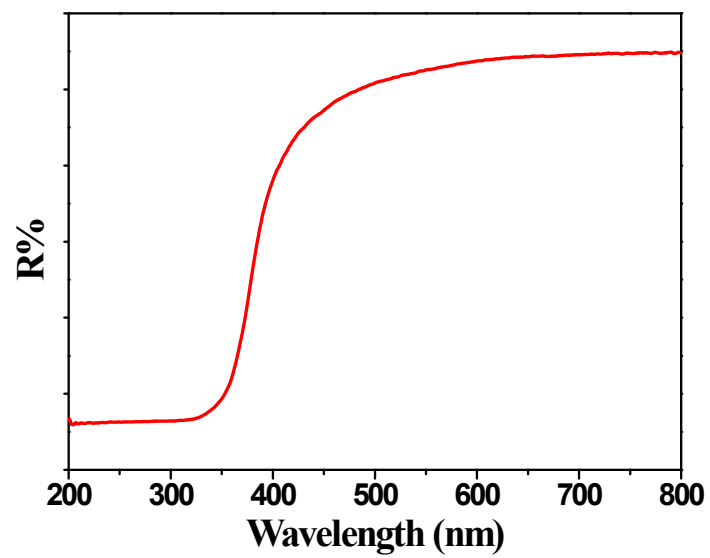

**Figure S1.** DR spectrum of the parent MTM.

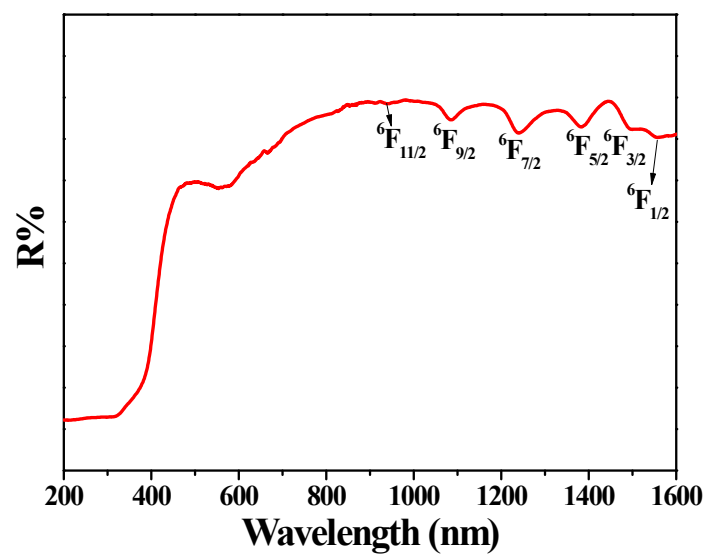

Figure S2. DR spectrum of Sm(dbm)<sub>3</sub>bpdc-MTM sample.

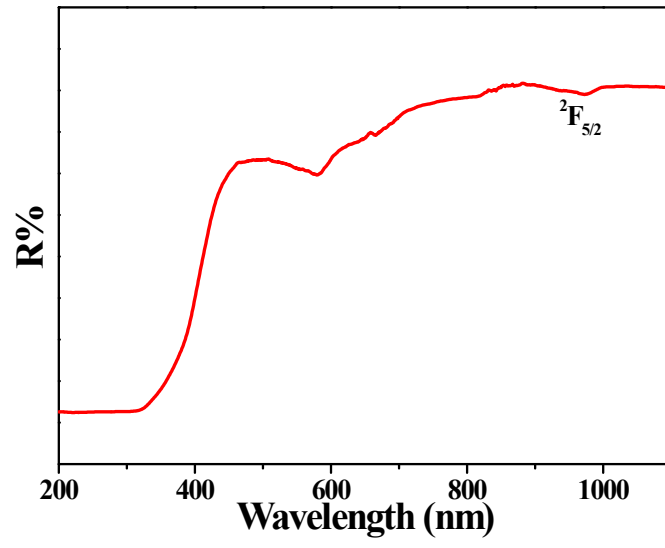

**Figure S3.** DR spectrum of  $\text{Yb}(\text{dbm})_3\text{bpdC}$ -MTM sample.

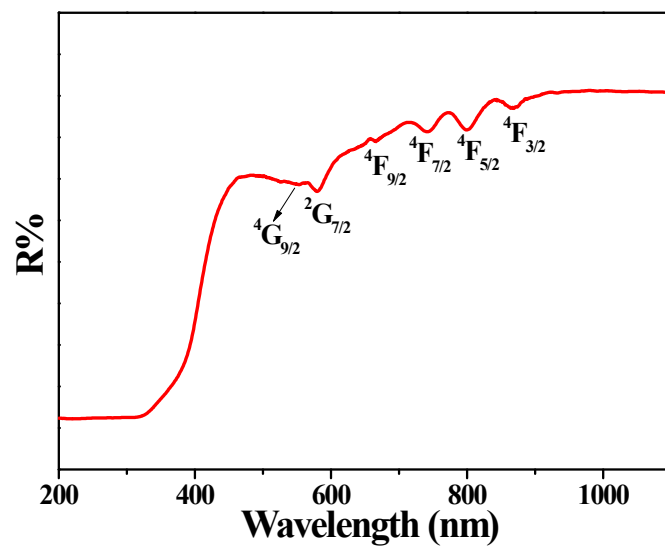

Figure S4. DR spectrum of Nd(dbm)<sub>3</sub>bpdc-MTM sample.

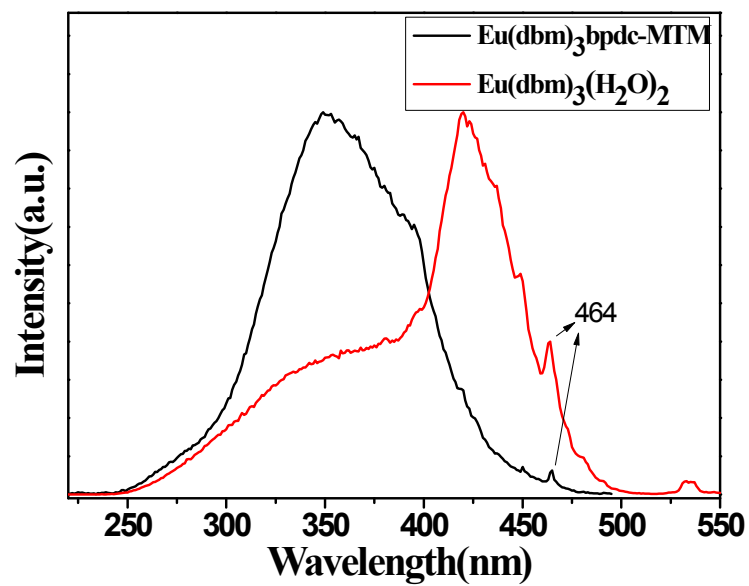

**Figure S5.** Excitation spectra of the  $\text{Eu}(\text{dbm})_3\text{bpdc-MTM}$  material ( $\lambda_{\text{em}} = 613 \text{ nm}$ ) and  $\text{Eu}(\text{dbm})_3(\text{H}_2\text{O})_2$  complex ( $\lambda_{\text{em}} = 614 \text{ nm}$ ).

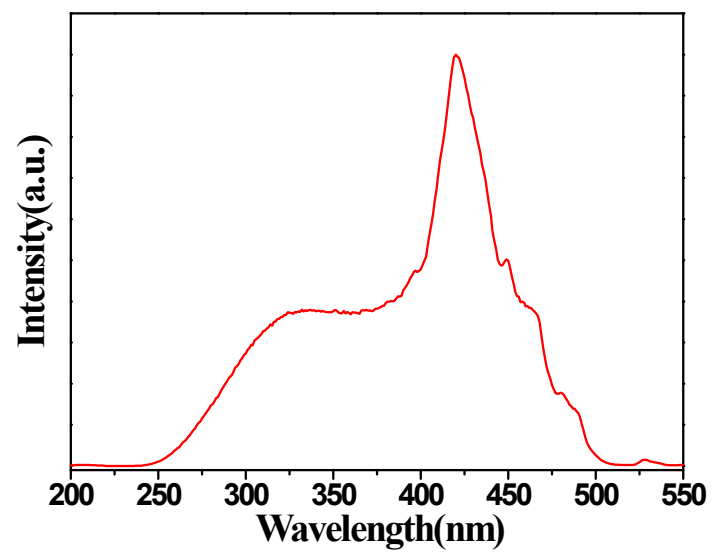

**Figure S6.** Excitation spectrum of the Sm(dbm)<sub>3</sub>(H<sub>2</sub>O)<sub>2</sub> complex ( $\lambda_{em} = 648$  nm).

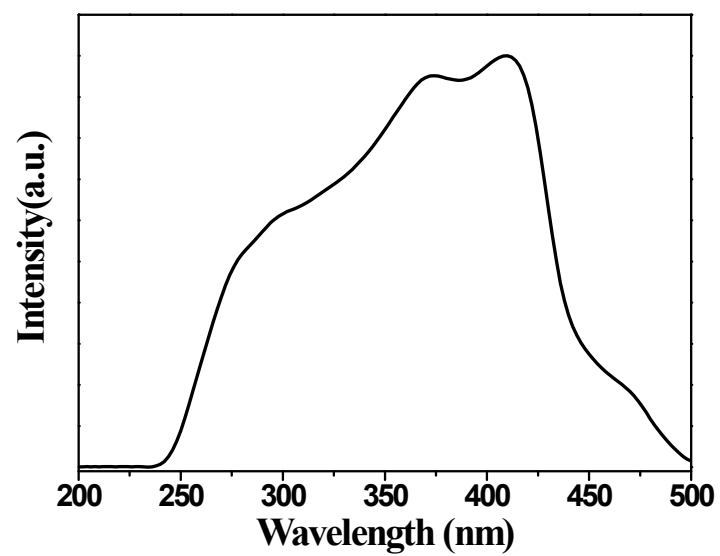

**Figure S7.** Excitation spectrum of the Yb(dbm)<sub>3</sub>(H<sub>2</sub>O)<sub>2</sub> complex ( $\lambda_{\text{em}} = 980$  nm).



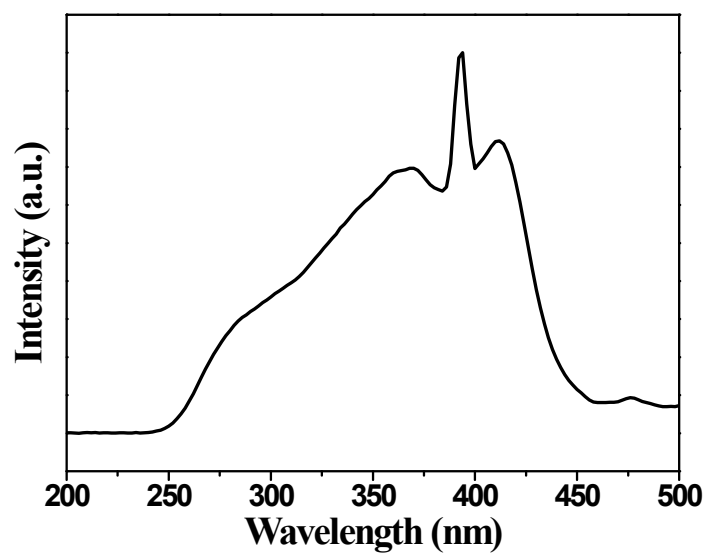

**Figure S8.** Excitation spectrum of the Nd(dbm)<sub>3</sub>(H<sub>2</sub>O)<sub>2</sub> complex ( $\lambda_{em} = 1065$  nm).

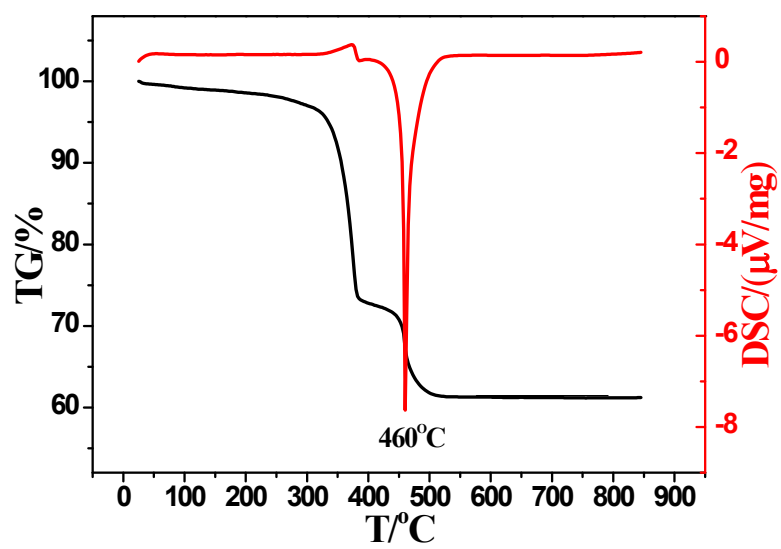

**Figure S9.** The TG and DSC curves of the  $\text{Eu}(\text{dbm})_3\text{bpdC-MTM}$  sample.

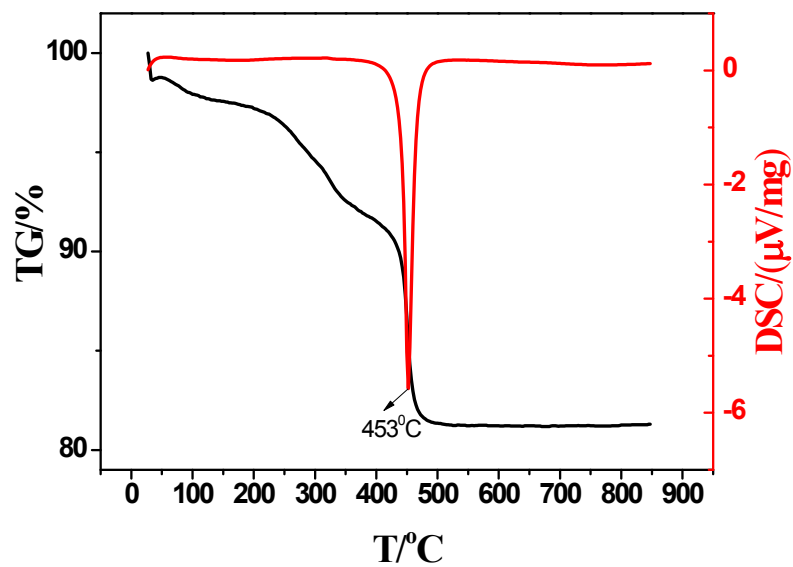

**Figure S10.** The TG and DSC curves of the  $\text{Sm}(\text{dbm})_3\text{bpdc}$ -MTM sample.

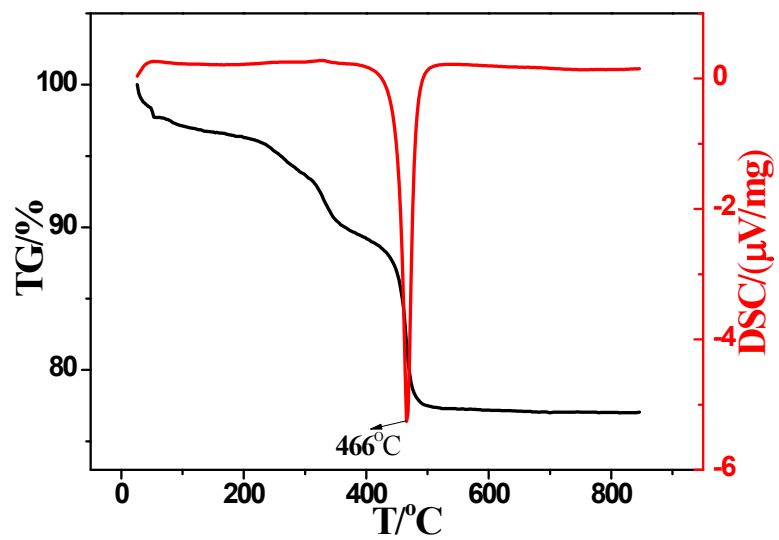

**Figure S11.** The TG and DSC curves of the  $\text{Yb}(\text{dbm})_3\text{bpdc-MTM}$
